# Supplementary material for: Comparative genome analysis of the SPL gene family reveals novel evolutionary features in maize
Source: PubMed Central journal article supplement (PMC6726161; doi:10.1590/1678-4685-gmb-2017-0144), 2019-07-01
Supplement: 1415-4757-GMB-1678-4685-GMB-2017-0144-suppl1.pdf [file 1415-4757-GMB-1678-4685-GMB-2017-0144-suppl1.pdf]

## Supplementary Material to "Comparative genome analysis of the SPL gene family reveals novel evolutionary features in maize"

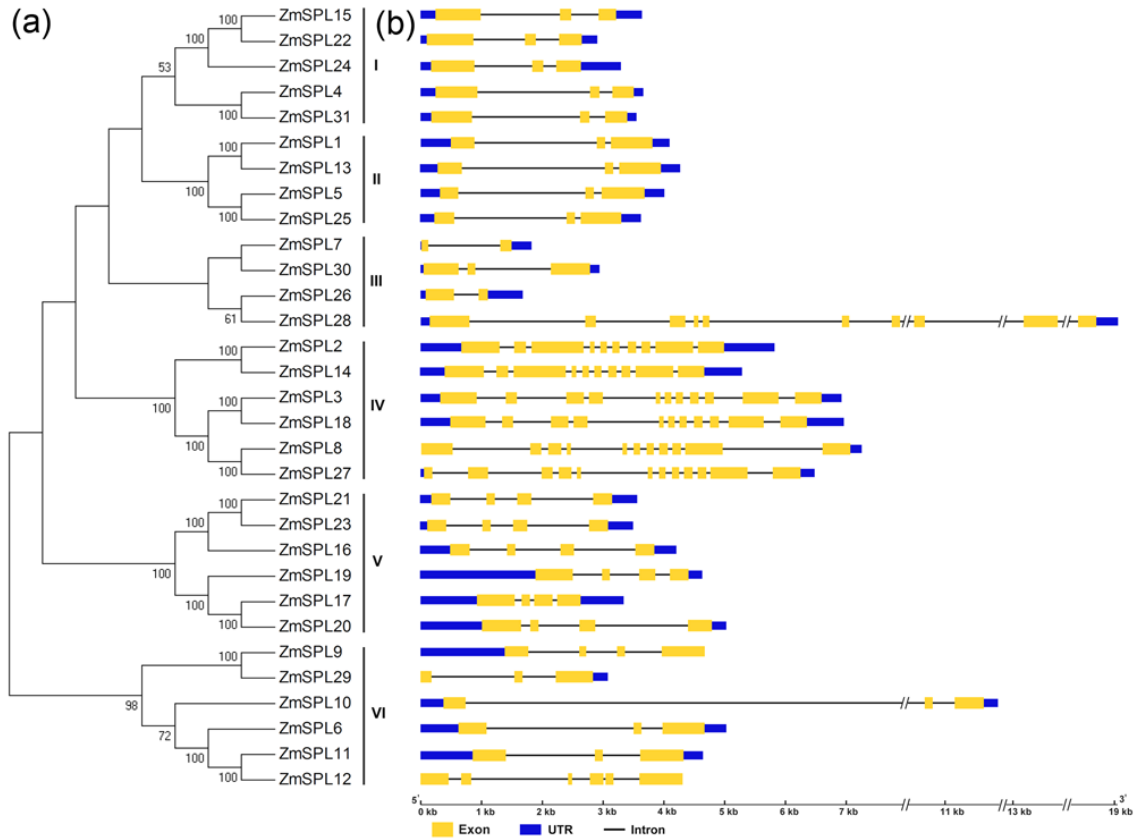

**Figure S1** - Phylogenetic relationships and gene structure of the *ZmSPLs*. (a) The unrooted tree was generated using MEGA4.0 program with the NJ method. Bootstrap values above 50% from 1,000 replicates are shown at each node. (b) Yellow rectangles and thin lines represent exons and introns, respectively. Blue lines represent the untranslated regions (UTRs).
