# Supplementary material for: Comparative genome analysis of the SPL gene family reveals novel evolutionary features in maize
Source: PubMed Central journal article supplement (PMC6726161; doi:10.1590/1678-4685-gmb-2017-0144), 2019-07-01
Supplement: 1415-4757-GMB-1678-4685-GMB-2017-0144-suppl5.pdf [file 1415-4757-GMB-1678-4685-GMB-2017-0144-suppl5.pdf]

## Supplementary Material to "Comparative genome analysis of the SPL gene family reveals novel evolutionary features in maize"

**Table S2** - Detailed information of the 31 *SPLs* in the maize genome

| Gene Name <sup>a</sup> | Ensembl transcript ID | ORF (bp) <sup>b</sup> | Introns | Deduced polypeptide <sup>c</sup> |         |       |
|------------------------|-----------------------|-----------------------|---------|----------------------------------|---------|-------|
|                        |                       |                       |         | Length(aa)                       | MW(kDa) | pI    |
| ZmSPL1                 | GRMZM2G160917_P02     | 1212                  | 2       | 403                              | 41.67   | 8.73  |
| ZmSPL2                 | GRMZM2G169270_P01     | 3321                  | 9       | 1106                             | 121.17  | 6.97  |
| ZmSPL3                 | GRMZM2G156756_P01     | 2919                  | 10      | 972                              | 105.91  | 5.43  |
| ZmSPL4                 | GRMZM2G036297_P01     | 1200                  | 2       | 399                              | 43.36   | 7.45  |
| ZmSPL5                 | GRMZM2G126018_P01     | 1152                  | 2       | 383                              | 40.20   | 8.64  |
| ZmSPL6                 | GRMZM2G061734_P01     | 1290                  | 2       | 429                              | 44.96   | 6.73  |
| ZmSPL7                 | GRMZM2G113779_P01     | 300                   | 1       | 99                               | 11.29   | 10.05 |
| ZmSPL8                 | GRMZM2G133646_P01     | 2646                  | 10      | 881                              | 98.61   | 7.27  |
| ZmSPL9                 | GRMZM5G878561_P01     | 1344                  | 3       | 447                              | 46.72   | 9.21  |
| ZmSPL10                | GRMZM2G106798_P01     | 978                   | 2       | 325                              | 34.38   | 8.70  |
| ZmSPL11                | GRMZM2G101511_P02     | 1395                  | 2       | 464                              | 49.88   | 9.77  |
| ZmSPL12                | AC233751.1_FGP002     | 1767                  | 5       | 588                              | 62.87   | 8.64  |
| ZmSPL13                | GRMZM2G460544_P01     | 1227                  | 2       | 408                              | 41.90   | 8.73  |
| ZmSPL14                | GRMZM2G098557_P01     | 3339                  | 9       | 1112                             | 121.81  | 7.54  |
| ZmSPL15                | GRMZM2G168229_P01     | 1221                  | 2       | 406                              | 42.60   | 8.88  |
| ZmSPL16                | GRMZM2G163813_P02     | 996                   | 3       | 331                              | 36.18   | 8.98  |
| ZmSPL17                | GRMZM2G065451_P01     | 1449                  | 3       | 482                              | 50.72   | 9.01  |
| ZmSPL18                | GRMZM2G138421_P01     | 2886                  | 10      | 961                              | 105.08  | 5.78  |
| ZmSPL19                | GRMZM2G414805_P03     | 1320                  | 3       | 439                              | 47.11   | 9.10  |
| ZmSPL20                | GRMZM2G097275_P01     | 1440                  | 3       | 479                              | 50.86   | 9.15  |
| ZmSPL21                | GRMZM2G126827_P01     | 999                   | 3       | 332                              | 36.51   | 8.96  |
| ZmSPL22                | GRMZM2G111136_P01     | 1323                  | 2       | 440                              | 46.00   | 6.70  |
| ZmSPL23                | GRMZM2G156621_P01     | 999                   | 3       | 332                              | 36.51   | 8.96  |
| ZmSPL24                | GRMZM2G101499_P01     | 1305                  | 2       | 434                              | 46.04   | 9.14  |
| ZmSPL25                | GRMZM2G307588_P01     | 1137                  | 2       | 378                              | 39.60   | 9.33  |
| ZmSPL26                | GRMZM2G067624_P02     | 621                   | 1       | 206                              | 21.04   | 9.75  |
| ZmSPL27                | GRMZM2G081127_P01     | 2586                  | 11      | 861                              | 96.56   | 7.48  |
| ZmSPL28                | GRMZM2G109354_P01     | 2553                  | 9       | 850                              | 94.02   | 5.41  |
| ZmSPL29                | GRMZM2G371033_P01     | 930                   | 2       | 309                              | 33.66   | 8.84  |
| ZmSPL30                | GRMZM2G148467_P01     | 1353                  | 2       | 450                              | 47.01   | 9.31  |
| ZmSPL31                | GRMZM2G058588_P01     | 1191                  | 2       | 396                              | 43.27   | 7.81  |

<sup>a</sup> Designated name of maize *SPL* genes in this study.

<sup>b</sup> Length of open reading frame in base pairs.

<sup>c</sup> Length (number of amino acids), molecular weight (kilodaltons), and isoelectric point (pI) of the deduced polypeptides.
