# Supplementary material for: Comparative genome analysis of the SPL gene family reveals novel evolutionary features in maize
Source: PubMed Central journal article supplement (PMC6726161; doi:10.1590/1678-4685-gmb-2017-0144), 2019-07-01
Supplement: 1415-4757-GMB-1678-4685-GMB-2017-0144-suppl8.pdf [file 1415-4757-GMB-1678-4685-GMB-2017-0144-suppl8.pdf]

## Supplementary Material to "Comparative genome analysis of the SPL gene family reveals novel evolutionary features in maize"

**Table S5** - Detailed information of the 20 motifs identified in *ZmSPLs*

| Motif | Width | Conserved amino acid sequences                                                                                                                                                                                   |
|-------|-------|------------------------------------------------------------------------------------------------------------------------------------------------------------------------------------------------------------------|
| 1     | 41    | GQEQRFCQQCSRFLLAEFDEKKRSCRKRLAGHNRRRRKPKQ                                                                                                                                                                        |
| 2     | 21    | KDYHRRHKVCEMHSKAPVVVV                                                                                                                                                                                            |
| 3     | 80    | TDKIVFKLFGKEPKDFPPNLRQILNWLKHYPTDMESYIRPGCIILTIYLRMPNWMWD<br>ELEENMAQWINKLINSSNDDFW                                                                                                                              |
| 4     | 15    | PRCQVEGCKADL SRC                                                                                                                                                                                                 |
| 5     | 80    | KVYLFTPMPGPSNITPLHIAATIEDAEDVLDALTDPPQQIGITCWKNARDETGF TPE<br>EYARKRGHNSYIELVQKKIDKM                                                                                                                             |
| 6     | 41    | YMLSMMIAIAAVCVVGIIMKTLPRVYAMKTFKWEKIEWGPM                                                                                                                                                                        |
| 7     | 42    | MTKEDVTDYCLIRFPMWRFRWLLVFAMEREWCAVIKMLLDIM                                                                                                                                                                       |
| 8     | 112   | DVSTKVGTTITGQVHLDKSHMFNAIPTLSHGKDEPWPMKGLDMSISASKFDGAADLQ<br>HALSLLSAGACGLPDSVHQTSCIIQFNGASENSSDLHVTHGRNSGPASCADAQHIA                                                                                            |
| 9     | 57    | NYPKILCVTPIAVPYSQTINFIVKGFNLVIPTTKLICTFEGKYIIQEETCMAYENTI                                                                                                                                                        |
| 10    | 200   | QTVPSTMDLLGVFPTGFATSTPETNTSQSQGSSDSSGNNKSKSHSTEPVTVVNSHDKS<br>TRDFPAAGFMRSNSTQESRPHIYKQTEQETRPYLSLQLFGSTEEDFPPKMDSINKYLSS<br>ESSNPLDERSPSSSPITRKFPIHSVDEEVRPHITDYGEDATMGEVSTNQAWCAPPL<br>DLFKDLERPIENGSPNPGYQSCY |
| 11    | 17    | VIGLKLGRKTYFEDACG                                                                                                                                                                                                |
| 12    | 159   | NYLLSLIGICANMNSDNVQNANGQELLSTLLKNLGSVAKSLEPKELCKFLEAYQSL<br>QNGLNAGTSGIANGTEEAAGPSNSKLPFVNDSHCGQASSSVVPVQSKATIVVTPEPAS<br>CKLKDFDLNDTCNDMEGFEDGQEGSPTPAFKTADSPNCASWMQQ                                           |
| 13    | 29    | RGFIEVEDYGFSNGFFPFIAEKDVCSEI                                                                                                                                                                                     |
| 14    | 29    | PMEMVLEENLLHTAVKRKSKNMVHFLRLRY                                                                                                                                                                                   |
| 15    | 15    | DSNCALSLLSTQPWD                                                                                                                                                                                                  |
| 16    | 20    | YRSQHLHFLNELGWLLQRNN                                                                                                                                                                                             |
| 17    | 33    | PDAFTFASARLPSTFYDDRRQISFVWNAKPYSH                                                                                                                                                                                |
| 18    | 18    | WDPNLWDWDNHAFTATPS                                                                                                                                                                                               |
| 19    | 78    | NQENAAARTQDIVNLITVIARLQGSNVGKVP SIPPDKQNLVEIISKINSFNNMTSPDK<br>SPPPEVVLDLTLQE QREQ                                                                                                                               |
| 20    | 24    | QEPGRFRSFMLDFS YPRVPSAMRD                                                                                                                                                                                        |
